# Supplementary material for: The Health Effects of Vitamin D and Probiotic Co-Supplementation: A Systematic Review of Randomized Controlled Trials
Source: MDPI journal article supplement (doi:10.3390/nu13010111), 2020-12-30
Supplement: s1 [file s1]

**Table S1.** Characteristics of included studies.

| Author, Year, Country     | Study design                                                | Duration | Study population                                                                                                                                                                                                                                                                                         | Intervention                                                                                                                                                                                                                                                                                             | Control                                                                                                                                         | Co-intervention                                                                                                                      | Compliance / Drop-out                                                                    |
|---------------------------|-------------------------------------------------------------|----------|----------------------------------------------------------------------------------------------------------------------------------------------------------------------------------------------------------------------------------------------------------------------------------------------------------|----------------------------------------------------------------------------------------------------------------------------------------------------------------------------------------------------------------------------------------------------------------------------------------------------------|-------------------------------------------------------------------------------------------------------------------------------------------------|--------------------------------------------------------------------------------------------------------------------------------------|------------------------------------------------------------------------------------------|
| Ghaderi, 2019, Iran [27]  | Randomized, double-blind, placebo-controlled trial          | 12 weeks | $n = 60$ , aged 25–65, 93.33% men, diagnosed with schizophrenia using DSM-IV-TR criteria with disease duration $\geq 2$ years, PANSS score $\geq 55$ , treated with chlorpromazine (300–1000 mg/day, except clozapine) and anticholinergic agents (Trihexyphenidyl, 4–8 mg/day) during the last 6 months | Vitamin D3 and probiotic supplement: Vitamin D3: 50,000 IU every 2 weeks; DDE= 3,571.4 IU - Probiotics: $8 \times 10^9$ CFU/day containing <i>Lactobacillus acidophilus</i> , <i>Bifidobacterium bifidum</i> , <i>Lactobacillus reuteri</i> , and <i>Lactobacillus fermentum</i> (each $2 \times 10^9$ ) | Placebo similar shape and packaging                                                                                                             | None                                                                                                                                 | Compliance: $>90\%$<br>Drop out: I: 13.33%<br>C: 13.33%<br>(Intention-to-treat analysis) |
| Jamalian, 2018, Iran [29] | Randomized, double-blind, placebo-controlled clinical trial | 6 weeks  | $n = 87$ , women with GDM diagnosed by a “one-step” 2-h 75-g oral glucose tolerance test based on the ADA guidelines                                                                                                                                                                                     | Vitamin D and probiotic supplement: Vitamin D: 50,000 IU every 2 weeks; DDE= 3,571.4 IU - Probiotics: $8 \times 10^9$ CFU/g probiotic containing <i>Lactobacillus acidophilus</i> , <i>Bifidobacterium bifidum</i> , <i>L. reuteri</i> , and <i>Lactobacillus fermentum</i> (each $2 \times 10^9$ CFU/g) | C1: $8 \times 10^9$ CFU/day of probiotic supplements<br>C2: Placebo<br>Similar in appearance, color, shape, size, smell and taste and packaging | Vitamin D3: 1000 IU and Vitamin B9: 400 mg, daily from the beginning of pregnancy, and Ferrous sulfate: 60 mg, daily from the second | Compliance: 100%<br>Drop out: I: 0%<br>C1: 6.66%<br>C2: 10%                              |

| trimester                                  |                                                                               |          |                                                                                                                                                                                    |                                                                                                                                                                                                                                                                                                                                                                  |                                                                                                        |                                                                                                |
|--------------------------------------------|-------------------------------------------------------------------------------|----------|------------------------------------------------------------------------------------------------------------------------------------------------------------------------------------|------------------------------------------------------------------------------------------------------------------------------------------------------------------------------------------------------------------------------------------------------------------------------------------------------------------------------------------------------------------|--------------------------------------------------------------------------------------------------------|------------------------------------------------------------------------------------------------|
| Ostadmo<br>hammad<br>i, 2019,<br>Iran [28] | Randomized<br>, double-<br>blind,<br>placebo-<br>controlled<br>clinical trial | 12 weeks | <i>n</i> = 60, aged 18–40 years,<br>women with PCOS,<br>diagnosed based on the<br>Rotterdam criteria with<br>BMI: 17–34 kg/m <sup>2</sup> and<br>insulin resistance: 1.4–4         | Vitamin D and<br>probiotic supplement:<br>- Vitamin D: 50,000 IU<br>every 2 weeks; DDE=<br>3,571.4 IU<br>- Probiotics: 8 × 10 <sup>9</sup><br>CFU/day containing<br><i>Lactobacillus acidophilus</i> ,<br><i>Bifidobacterium bifidum</i> ,<br><i>Lactobacillus reuteri</i> and<br><i>Lactobacillus fermentum</i><br>(each 2 × 10 <sup>9</sup> CFU/g)             | Placebo<br>similar in<br>appearance<br>, color,<br>shape, size,<br>smell and<br>taste and<br>packaging | Compliance 100%;<br>No drop<br>out                                                             |
|                                            |                                                                               |          |                                                                                                                                                                                    |                                                                                                                                                                                                                                                                                                                                                                  | None                                                                                                   |                                                                                                |
| Raygan,<br>2018,<br>Iran [30]              | Randomized<br>, double-<br>blind,<br>placebo-<br>controlled<br>clinical trial | 12 weeks | <i>n</i> = 60, age 45–85 years,<br>50% men, with T2DM<br>diagnosed based on the<br>criteria of the ADA and<br>with CHD diagnosed as<br>per the AHA with 2- and 3-<br>vessel CHD    | Vitamin D3 and<br>probiotic supplement:<br>- Vitamin D3: 50,000 IU<br>every 2 weeks; DDE=<br>3,571.4 IU<br>- Probiotics: 8 × 10 <sup>9</sup><br>CFU/g<br>containing <i>Lactobacillus</i><br><i>acidophilus</i> ,<br><i>Bifidobacterium bifidum</i> ,<br><i>Lactobacillus reuteri</i> , and<br><i>Lactobacillus fermentum</i><br>(each 2 × 10 <sup>9</sup> CFU/g) | Placebo<br>similar in<br>appearance<br>, color,<br>shape, size,<br>smell and<br>taste and<br>packaging | Compliance >90%<br>Drop out:<br>I: 13.33%<br>C: 13.33%<br>(Intention-<br>to-treat<br>analysis) |
|                                            |                                                                               |          |                                                                                                                                                                                    |                                                                                                                                                                                                                                                                                                                                                                  | None                                                                                                   |                                                                                                |
| Jafarnejad,<br>2017,<br>Iran [31]          | Randomized<br>, double-<br>blind,<br>placebo-<br>controlled<br>clinical trial | 6 weeks  | <i>n</i> = 50, age 50–72 years,<br>women with mild bone<br>loss (osteopenia)<br>diagnosed based on the<br>World Health Organization<br>criteria (T-score between<br>−1.0 and −2.5) | Probiotic supplement:<br><i>Lactobacillus casei</i> 1.3 ×<br>10 <sup>10</sup> CFU,<br><i>Bifidobacterium longum</i> 5<br>× 10 <sup>10</sup> CFU, <i>Lactobacillus</i><br><i>acidophilus</i> 1.5 × 10 <sup>10</sup><br>CFU, <i>Lactobacillus</i>                                                                                                                  | Placebo<br>similar in<br>shape, size,<br>odor, color<br>and<br>packaging                               | Compliance 100%<br>Drop out:<br>I: 20%<br>C: 16%                                               |
|                                            |                                                                               |          |                                                                                                                                                                                    |                                                                                                                                                                                                                                                                                                                                                                  | Vitamin D<br>(200 IU<br>daily) and<br>Calcium<br>(500 mg<br>daily)                                     |                                                                                                |

|                                      |                                                            |          |                                                                                                                                                                                                                   |                                                                                                                                                                                                                                                                                                                                                          |                                                                                                                  |      |                                 |
|--------------------------------------|------------------------------------------------------------|----------|-------------------------------------------------------------------------------------------------------------------------------------------------------------------------------------------------------------------|----------------------------------------------------------------------------------------------------------------------------------------------------------------------------------------------------------------------------------------------------------------------------------------------------------------------------------------------------------|------------------------------------------------------------------------------------------------------------------|------|---------------------------------|
|                                      |                                                            |          |                                                                                                                                                                                                                   | <i>rhamnosus</i> $3.5 \times 10^9$ CFU, <i>Lactobacillus bulgaricus</i> $2.5 \times 10^8$ CFU, <i>Bifidobacterium breve</i> $1 \times 10^{10}$ CFU, and <i>Streptococcus thermophilus</i> $1.5 \times 10^8$ CFU/500 mg                                                                                                                                   |                                                                                                                  |      |                                 |
| Savino, Italy [25]                   | Single-blind, randomized, controlled, parallel-group trial | 12 weeks | $n = 105$ , newborns aged less than 10 days of life, 48.5% boys, with gestational age between 37 and 42 weeks, birth weight from 2,500 to 4,300 g, and normal physical examination                                | Vitamin D and probiotic supplement:<br>- Vitamin D3: 400 IU daily<br>- Probiotics: <i>Lactobacillus reuteri</i> DSM 17938 ( $10^8$ CFU)                                                                                                                                                                                                                  | Vitamin D (400 IU daily)                                                                                         | None | No infants lost to follow-ups   |
| Tazzyma n, 2015, United Kingdom [26] | Double-blind, randomized, three-arm parallel design trial  | 12 weeks | $N = 51$ , 7.8% men, with previous clinical diagnosis of IBS and met the Rome III criteria and stratified according to vitamin D status at baseline (deficient: 25(OH)D < 20 ng/mL; repleted: 25(OH)D > 20 ng/mL) | Vitamin D3 and probiotic supplement:<br>- Vitamin D3: sublingual liquid spray, 3000 IU daily<br>- Probiotics: <i>Lactobacillus acidophilus</i> , CUL60 (NCIMB 30157), CUL21 (NCIMB 30156), <i>Bifidobacterium bifidum</i> CUL20 (NCIMB 30153) and <i>Bifidobacterium animalis subsp. lactis</i> CUL34 (NCIMB 30172) $2.5 \times 10^{10}$ CFU per capsule | C1: Double placebo<br>C2: Placebo and Vitamin D3 (400 IU daily)<br>Similar in form, containing identical buffers | None | Compliance: 98%<br>Drop out: 0% |

25(OH)D: 25-hydroxyvitamin D; ADA: American Diabetes Association; AHA: American Heart Association; BMI: Body Mass Index; C: Control; CFU: Colony Forming Units; CHD: Coronary Heart Disease; DDE: Daily Dose Equivalent; DSM-IV-TR: Diagnostic and Statistical Manual of Mental Disorders, Fourth Edition,

Text Revision; GDM: Gestational Diabetes Mellitus; I: Intervention; IBS: Irritable Bowel Syndrome; IU: International Unit; PANSS: The Positive and Negative Syndrome Scale; PCOS: Polycystic Ovary Syndrome; T2DM: Type 2 Diabetes Mellitus; TDD: Total Daily Dose.

**Table S2.** Outcomes and results of included studies.

| Author,<br>Year,<br>Country    | Outcome measures                                                                                                                          | Results                                                                                                                                                                                                                                                                                                                                                                                                                                                                                                                                                            | Conclusion                                                                                                                                                                                                              |
|--------------------------------|-------------------------------------------------------------------------------------------------------------------------------------------|--------------------------------------------------------------------------------------------------------------------------------------------------------------------------------------------------------------------------------------------------------------------------------------------------------------------------------------------------------------------------------------------------------------------------------------------------------------------------------------------------------------------------------------------------------------------|-------------------------------------------------------------------------------------------------------------------------------------------------------------------------------------------------------------------------|
| Ghaderi,<br>2019, Iran<br>[27] | BMI: weight in kg divided by height in meters squared (height and weight measured without shoes and in light clothing by a trained staff) | At baseline and endline: No significant difference between-groups, in height, age, weight, BMI and METs                                                                                                                                                                                                                                                                                                                                                                                                                                                            | Probiotic and vitamin D co-supplementation for 12 weeks to patients with chronic schizophrenia had beneficial effects on the general and total PANSS scores, as well as their metabolic profiles, compared with placebo |
|                                | Serum 25-hydroxyvitamin D: ELISA kit                                                                                                      | At baseline: Significant difference between-groups for positive PANSS score, BPRS, GSH and plasma NO                                                                                                                                                                                                                                                                                                                                                                                                                                                               |                                                                                                                                                                                                                         |
|                                | Severity of psychiatric symptoms: PANSS                                                                                                   | At endline:                                                                                                                                                                                                                                                                                                                                                                                                                                                                                                                                                        |                                                                                                                                                                                                                         |
|                                | Domains of cognitive function: BPRS scores                                                                                                | In the I group compared with the C group: Significant greater decrease in MDA ( $-0.3 \pm 0.9$ vs. $+0.2 \pm 0.4$ $\mu\text{mol/L}$ ), serum hs-CRP ( $-2.3 \pm 3.0$ vs. $-0.3 \pm 0.8$ $\text{mg/L}$ ), FPG ( $-7.0 \pm 9.9$ vs. $-0.2 \pm 9.9$ $\text{mg/dL}$ ), serum insulin ( $-2.7 \pm 2.3$ vs. $+0.4 \pm 2.0$ $\mu\text{IU/mL}$ ), HOMA-IR ( $-0.8 \pm 0.7$ vs. $+0.1 \pm 0.7$ ), TG ( $-7.8 \pm 25.2$ vs. $+10.1 \pm 30.8$ $\text{mg/dL}$ ), TC ( $-4.9 \pm 15.0$ vs. $+5.9 \pm 19.5$ $\text{mg/dL}$ ), and TC/HDL-C ( $-0.1 \pm 0.6$ vs. $+0.3 \pm 0.8$ ) |                                                                                                                                                                                                                         |
|                                | TAC: method of ferric reduction antioxidant power developed by Benzie and Strain                                                          | Significant greater increase in 25-hydroxyvitamin D ( $+9.1 \pm 4.1$ vs. $+0.2 \pm 0.4$ $\text{ng/mL}$ ), general PANSS score ( $-3.1 \pm 4.7$ vs. $+0.3 \pm 3.9$ ), total PANSS score ( $-7.4 \pm 8.7$ vs. $-1.9 \pm 7.5$ ), plasma TAC ( $+51.1 \pm 129.7$ vs. $-20.7 \pm 53.3$ $\text{mmol/L}$ ), QUICKI ( $+0.02 \pm 0.01$ vs. $+0.0003 \pm 0.01$ )                                                                                                                                                                                                            |                                                                                                                                                                                                                         |
|                                | GSH: Beutler method                                                                                                                       |                                                                                                                                                                                                                                                                                                                                                                                                                                                                                                                                                                    |                                                                                                                                                                                                                         |
|                                | MDA: Thiobarbituric acid reactive substances spectrophotometric Test                                                                      |                                                                                                                                                                                                                                                                                                                                                                                                                                                                                                                                                                    |                                                                                                                                                                                                                         |
|                                | Serum hs-CRP: ELISA kit                                                                                                                   |                                                                                                                                                                                                                                                                                                                                                                                                                                                                                                                                                                    |                                                                                                                                                                                                                         |
|                                | NO: Griess Method                                                                                                                         |                                                                                                                                                                                                                                                                                                                                                                                                                                                                                                                                                                    |                                                                                                                                                                                                                         |
|                                | Serum insulin: ELISA kit                                                                                                                  |                                                                                                                                                                                                                                                                                                                                                                                                                                                                                                                                                                    |                                                                                                                                                                                                                         |
|                                | HOMA-IR and QUICKI: calculated using standard formula                                                                                     |                                                                                                                                                                                                                                                                                                                                                                                                                                                                                                                                                                    |                                                                                                                                                                                                                         |
|                                | FPG and lipid profiles: Enzymatic kits                                                                                                    |                                                                                                                                                                                                                                                                                                                                                                                                                                                                                                                                                                    |                                                                                                                                                                                                                         |

|                           |                                                                                                                                                                                                                               |                                                                                                                                                                                                                                                                                                                                         |                                                                                                                                                                                                                                                                  |
|---------------------------|-------------------------------------------------------------------------------------------------------------------------------------------------------------------------------------------------------------------------------|-----------------------------------------------------------------------------------------------------------------------------------------------------------------------------------------------------------------------------------------------------------------------------------------------------------------------------------------|------------------------------------------------------------------------------------------------------------------------------------------------------------------------------------------------------------------------------------------------------------------|
|                           |                                                                                                                                                                                                                               | No significant difference in the change of BPRS score and other metabolic profiles                                                                                                                                                                                                                                                      |                                                                                                                                                                                                                                                                  |
|                           |                                                                                                                                                                                                                               | In the analysis adjusting for baseline values of biochemical parameters, age and BMI, and controlling for potential confounders:<br>The difference in changes in TC/HDL between the two groups became non-significant<br>The difference in changes in negative PANSS score, BPRS and plasma GSH became statistically significant        |                                                                                                                                                                                                                                                                  |
|                           |                                                                                                                                                                                                                               | Other metabolic profiles did not change statically                                                                                                                                                                                                                                                                                      |                                                                                                                                                                                                                                                                  |
|                           | BMI: weight in kg divided by height in meters squared (height and weight measured without shoes and in light clothing by a trained staff)                                                                                     | At baseline and endline: No significant difference between-groups, in age, height, weight, BMI, METs and intakes of macro- and micronutrients                                                                                                                                                                                           |                                                                                                                                                                                                                                                                  |
|                           | Polyhydramnios: sonographic estimation method at post-intervention and defined as an AFI in excess of 25 cm                                                                                                                   | At endline:<br>In the I group compared with the C1 group<br>Significant greater decrease in TG ( $\beta$ -15.82 mg/dL), VLDL-C ( $\beta$ -3.16 mg/dL) and hs-CRP ( $\beta$ -0.32 mg/L)<br>Significant greater increase in serum 25-hydroxyvitamin D ( $\beta$ 16.16 ng/mL), TAC ( $\beta$ 63.26 mmol/L) and GSH ( $\beta$ 53.61 mmol/L) | High dose of vitamin D and probiotic co-supplementation for 6 weeks to women with GDM had beneficial effects on metabolic status and newborns' outcomes compared with placebo and low dose of vitamin D or probiotic supplementation and a low dose of vitamin D |
| Jamilian, 2018, Iran [29] | Preterm delivery: defined as delivery occurred at <37 weeks of pregnancy<br>Newborn's macrosomia: defined as birth weight of >4000 g. 2.5                                                                                     | Lower incidence of hyperbilirubinemia in newborns (10.0% vs. 13.8%)<br>Lower incidence of newborns' hospitalization (10.0% vs. 10.3%)<br>No significant changes in other pregnancy outcomes                                                                                                                                             |                                                                                                                                                                                                                                                                  |
|                           | Serum 25-hydroxyvitamin D: ELISA kit<br>Serum insulin: ELISA kit<br>HOMA-IR and QUICKI: calculated according to the standard formula<br>FPG, serum TG, VLDL-C, TC, LDL-C and HDL-C: enzymatic kits<br>Serum hs-CRP: ELISA kit | In the I group compared with C2 group:<br>Significant greater decrease in FPG ( $\beta$ -10.99 mg/dL), serum insulin ( $\beta$ -1.95 mIU/mL), HOMA-IR ( $\beta$ -0.76; 95%), TG ( $\beta$ -37.56 mg/dL), VLDL-C ( $\beta$                                                                                                               |                                                                                                                                                                                                                                                                  |

|                                          |                                                                                                                                                                                                                                                                                                                                                                                                                                                                           |                                                                                                                                                                                                                                                                                                                                                                                                                                                                                                                                                                                                                                                                                                                                                                                                                                                                                                                                                           |                                                                                                                                                                                                                                                           |
|------------------------------------------|---------------------------------------------------------------------------------------------------------------------------------------------------------------------------------------------------------------------------------------------------------------------------------------------------------------------------------------------------------------------------------------------------------------------------------------------------------------------------|-----------------------------------------------------------------------------------------------------------------------------------------------------------------------------------------------------------------------------------------------------------------------------------------------------------------------------------------------------------------------------------------------------------------------------------------------------------------------------------------------------------------------------------------------------------------------------------------------------------------------------------------------------------------------------------------------------------------------------------------------------------------------------------------------------------------------------------------------------------------------------------------------------------------------------------------------------------|-----------------------------------------------------------------------------------------------------------------------------------------------------------------------------------------------------------------------------------------------------------|
|                                          | Plasma NO: Griess method<br>TAC: method of ferric reducing<br>antioxidant power developed by<br>Benzie and Strain<br>GSH: Beutler method<br>MDA: Thiobarbituric acid reactive<br>substances spectrophotometric Test<br>Newborns' hyperbilirubinemia: when<br>the total serum bilirubin levels were at<br>$\geq 15$ mg/dL (257 mmol/L) among<br>infants 25–48 h old, 18 mg/dL (308<br>mmol/L) in infants 49–72 h old, and 20<br>mg/dL (342 mmol/L) in infants >72 h<br>old | –7.51 mg/dL), HDL/TC B: –0.52), hs-CRP ( $\beta$ –1.80<br>mg/L) and MDA ( $\beta$ –0.43 mmol/L)<br>Significant greater increase in 25-hydroxyvitamin D<br>( $\beta$ 18.21 ng/mL), QUICKI ( $\beta$ 0.01) HDL-C ( $\beta$ 4.09<br>mg/dL) and TAC ( $\beta$ 97.77 mmol/L)<br>No significant changes in other metabolic<br>parameters<br>Lower incidence of hyperbilirubinemia in newborns<br>(10.0% vs. 35.7%)<br>Lower incidence of newborns' hospitalization (10.0%<br>vs. 32.1%)<br>No significant changes in other pregnancy outcomes<br><br>In the C1 group compared with the C2 group<br>Significant greater decrease in FPG ( $\beta$ –8.60 mg/dL),<br>Insulin ( $\beta$ –1.34 $\mu$ IU/mL), HOMA-IR ( $\beta$ –0.54), TG ( $\beta$<br>–21.73 mg/dL), VLDL-C ( $\beta$ –4.34 mg/dL) and hs-CRP<br>( $\beta$ –1.36 mg/L), and MDA ( $\beta$ –0.50 $\mu$ mol/L)<br>Significant greater increase in serum 25-<br>hydroxyvitamin D ( $\beta$ 2.05 ng/mL) |                                                                                                                                                                                                                                                           |
| Ostadmo<br>hammad,<br>2019, Iran<br>[28] | Hirsutism: mFG scoring system<br>Mental health: BDI, GHQ–28 and<br>DASS<br>Quality of sleep: PSQI<br>Serum 25-hydroxyvitamin D: ELISA<br>kit<br>Serum total testosterone and SHBG:<br>ELISA kits<br>hs-CRP: ELISA kit<br>Plasma NO: Griess method<br>TAC: Benzie and Strain method<br>GSH: Beutler method                                                                                                                                                                 | At baseline:<br>No significant difference between groups for mean<br>age, height and dietary macro- and micro-nutrient<br>intakes.<br><br>At endline:<br>In the I group compared with the C group:<br>Significant greater decrease in BDI ( $\beta$ –0.58), GHQ ( $\beta$<br>– 0.93), DASS ( $\beta$ – 0.90), total testosterone ( $\beta$ – 0.19<br>ng/mL), hirsutism ( $\beta$ – 0.95), hs-CRP ( $\beta$ – 0.67 mg/L)<br>and MDA ( $\beta$ – 0.25 $\mu$ mol/L)<br>Significant greater increase in TAC ( $\beta$ 82.81 mmol/L)<br>and GSH ( $\beta$ 40.42 $\mu$ mol/L)                                                                                                                                                                                                                                                                                                                                                                                   | Vitamin D and probiotic<br>co-supplementation for<br>12 weeks to women with<br>PCOS had beneficial<br>effects on mental health<br>parameters, but did not<br>affect serum SHBG,<br>plasma NO levels, acne,<br>alopecia and PSQI,<br>compared with placebo |

|                             |                                                                                                                                                                                                                                                                                                                                                                                 |                                                                                                                                                                                                                                                                                                                                                                                                                                                                                                                                                                                                                                                                                                                                                                                                                                                                                                                                                                                |                                                                                                                                                                                                                                                                                   |
|-----------------------------|---------------------------------------------------------------------------------------------------------------------------------------------------------------------------------------------------------------------------------------------------------------------------------------------------------------------------------------------------------------------------------|--------------------------------------------------------------------------------------------------------------------------------------------------------------------------------------------------------------------------------------------------------------------------------------------------------------------------------------------------------------------------------------------------------------------------------------------------------------------------------------------------------------------------------------------------------------------------------------------------------------------------------------------------------------------------------------------------------------------------------------------------------------------------------------------------------------------------------------------------------------------------------------------------------------------------------------------------------------------------------|-----------------------------------------------------------------------------------------------------------------------------------------------------------------------------------------------------------------------------------------------------------------------------------|
|                             | MDA: Thiobarbituric acid reactive substances spectrophotometric Test                                                                                                                                                                                                                                                                                                            | No significant effect on serum SHBG and plasma NO levels, acne, alopecia and PSQI                                                                                                                                                                                                                                                                                                                                                                                                                                                                                                                                                                                                                                                                                                                                                                                                                                                                                              |                                                                                                                                                                                                                                                                                   |
|                             |                                                                                                                                                                                                                                                                                                                                                                                 | At baseline and endline:<br>No significant differences between-groups in mean age, height, weight, BMI and METs and macro and micronutrient intakes                                                                                                                                                                                                                                                                                                                                                                                                                                                                                                                                                                                                                                                                                                                                                                                                                            |                                                                                                                                                                                                                                                                                   |
| Raygan, 2018, Iran [30]     | Serum 25-hydroxyvitamin D: ELISA<br>FPG and lipid profiles: Enzymatic kit<br>Insulin: ELISA kit<br>HOMA-IR and QUICKI: standard formula<br>Hs-CRP: ELISA kit<br>Plasma TAC: Benzie and Strain method<br>GSH: Beutler and Gelbart method<br>MDA: spectrophotometric test<br>NO: Griess method<br>SBP and DBP: sphygmomanometer (Not detailed)<br>Mental health: BDI, BAI, GHQ-28 | At endline:<br>In the I group compared with the C group:<br>Significant greater decrease in BDI ( $-2.8 \pm 3.8$ vs. $-0.9 \pm 2.1$ ), BAI ( $-2.1 \pm 2.3$ vs. $-0.8 \pm 1.4$ ) and GHQ scores ( $-3.9 \pm 4.1$ vs. $-1.1 \pm 3.4$ ), Insulin ( $\mu\text{IU/mL}$ ) ( $-2.8 \pm 3.8$ vs. $+0.2 \pm 4.9$ ), HOMA-IR ( $-1.0 \pm 1.6$ vs. $-0.1 \pm 1.5$ ), and hs-CRP ( $\text{ng/mL}$ ) ( $-950.0 \pm 1811.2$ vs. $+260.5 \pm 2298.2$ )<br><br>Significant greater increase in 25-hydroxyvitamin D ( $\text{ng/mL}$ ) ( $+11.8 \pm 5.9$ vs. $+0.1 \pm 1.4$ ), QUICKI ( $+0.03 \pm 0.04$ vs. $-0.001 \pm 0.01$ ), serum HDL-cholesterol ( $\text{mg/dL}$ ) ( $+2.3 \pm 3.5$ vs. $-0.5 \pm 3.8$ ), plasma NO ( $\mu\text{mol/L}$ ) ( $+1.7 \pm 4.0$ vs. $-1.4 \pm 6.7$ ) and plasma TAC ( $\text{mmol/L}$ ) ( $+12.6 \pm 41.6$ vs. $-116.9 \pm 324.2$ )<br><br>No significant different changes in FPG, Triglycerides, VLDL-Cholesterol, LDL-Cholesterol, GSH, MDA, SBP and DBP | Vitamin D and probiotic co-supplementation for 12 weeks to diabetic people with CHD had beneficial effects on mental health, glycemic control, HDL-cholesterol levels, hs-CRP, NO and TAC, but did not affect other metabolic profiles and blood pressures, compared with placebo |
| Jafarnejad, 2017, Iran [31] | Nutrient intake: 3-day dietary recall (2 weekdays and one weekend day), through monthly interview throughout the study period; nutrient analysis: by Nutritionist IV software modified for Iranian foods<br>Physical activity: daily physical activity questionnaires validated by                                                                                              | At baseline: No significant differences between-groups<br><br>At endline:<br>Significant between-group differences in BALP (U/L) (I: $19.65 \pm 1.66$ at baseline and $16.53 \pm 0.90$ at endline vs. C: $17.81 \pm 1.35$ at baseline and $18.63 \pm 1.29$ at endline); CTX ( $\text{ng/ml}$ ) (I: $0.41 \pm 0.02$ at                                                                                                                                                                                                                                                                                                                                                                                                                                                                                                                                                                                                                                                          | Supplementation with probiotics, vitamin D and calcium for 6 weeks to postmenopausal osteopenic women showed a possible role in suppressing bone resorption and bone                                                                                                              |

|                                 |                                                                                                                                                                                                                                                                                                                                                                                                                                                                                                                                                                                                                                                                                                                                                                                                                                                           |                                                                                                                                                                                                                                                                                                                                                                                                                                                                                                                                                                                                                                                                                                                                                                                                                                                                                                                                            |                                                                                                                                                                                                |
|---------------------------------|-----------------------------------------------------------------------------------------------------------------------------------------------------------------------------------------------------------------------------------------------------------------------------------------------------------------------------------------------------------------------------------------------------------------------------------------------------------------------------------------------------------------------------------------------------------------------------------------------------------------------------------------------------------------------------------------------------------------------------------------------------------------------------------------------------------------------------------------------------------|--------------------------------------------------------------------------------------------------------------------------------------------------------------------------------------------------------------------------------------------------------------------------------------------------------------------------------------------------------------------------------------------------------------------------------------------------------------------------------------------------------------------------------------------------------------------------------------------------------------------------------------------------------------------------------------------------------------------------------------------------------------------------------------------------------------------------------------------------------------------------------------------------------------------------------------------|------------------------------------------------------------------------------------------------------------------------------------------------------------------------------------------------|
|                                 | <p>Kelishady et al. and calculated as metabolic equivalents/day</p> <p>Body weight: measured wearing light clothes without shoes using digital scales with 100-g precision</p> <p>Height: measured using a stadiometer with 0.5-cm precision in a normal standing position without shoes.</p> <p>BMI: weight in kilograms divided by height in meters squared</p> <p>BMD: dual energy X-ray absorptiometry</p> <p>Bone and pro-inflammatory biomarkers (TNF-<math>\alpha</math> and IL-1b), Total serum levels of BALP, Osteocalcin, CTX, Vitamin D, RANKL, Osteoprotegrin, Serum TNF-<math>\alpha</math> and IL-1b, Serum PTH, Urinary deoxypyridinoline: ELISA kits</p> <p>Serum calcium, phosphorus, magnesium, albumin, creatinine, alkaline phosphatase, and urinary amounts of calcium, phosphorus, magnesium, and creatinine: Pars Azmoon kits</p> | <p>baseline and <math>0.35 \pm 0.02</math> at endline vs. C: <math>0.45 \pm 0.02</math> at baseline and <math>0.42 \pm 0.02</math> at endline); TNF-<math>\alpha</math> (pg/ml) (I: <math>4.24 \pm 0.5</math> at baseline and <math>3.73 \pm 0.43</math> at endline vs. <math>3.83 \pm 0.47</math> at baseline and <math>4.32 \pm 0.5</math> at endline); PTH (pg/ml) (I: <math>31.92 \pm 1.39</math> at baseline and <math>29.05 \pm 1.53</math> at endline vs. C: <math>30.65 \pm 1.44</math> at baseline and <math>32.81 \pm 1.72</math> at endline)</p> <p>No significant between-group difference in Spinal BMD, Total hip BMD, RANKL, osteoprotegrin, RANKL/ osteoprotegrin ratio, deoxypyridinoline, osteocalcin, IL-1, Vitamin D, serum calcium, 24-Hour urinary Calcium, Serum phosphorus, 24-Hour urinary phosphorus, Serum magnesium, 24-Hour urinary magnesium, Serum creatinine, 24-Hour urinary creatinine, ALP, Albumin</p> | <p>turnover, but did not affect bone density and other serum indicators compared with placebo, vitamin D and calcium</p>                                                                       |
| <p>Savino, 2015, Italy [25]</p> | <p>Administration of pain-relieving agents (cimetropium bromide at least three times per week or simethicone at least five times per week): daily reporting by parents</p>                                                                                                                                                                                                                                                                                                                                                                                                                                                                                                                                                                                                                                                                                | <p>In the I group compared with the C group:</p> <ul style="list-style-type: none"> <li>- Significantly lower use of pain-relieving agents: Cimetropium bromide: RR: 0.04 (95%CI: 0.01–0.31); Simethicone: RR: 0.24 (95%CI: 0.14–0.41)</li> <li>- Significantly lower use of infant formula: RR: 0.37 (95%CI: 0.17- 0.80)</li> <li>- Significantly lower number of calls to the pediatrician: <math>5.04 \pm 2.64</math> vs. <math>8.40 \pm 3.58</math></li> </ul>                                                                                                                                                                                                                                                                                                                                                                                                                                                                         | <p>Vitamin D and probiotic co-supplementation for 12 weeks to newborns was associated with a reduction of pediatric consultations for infantile colic, use of pain-relieving agents and of</p> |



|                          |                                                                                                                                                                                                                             |                                                                                                                                                                                                                                                                                                                                                                                                        |
|--------------------------|-----------------------------------------------------------------------------------------------------------------------------------------------------------------------------------------------------------------------------|--------------------------------------------------------------------------------------------------------------------------------------------------------------------------------------------------------------------------------------------------------------------------------------------------------------------------------------------------------------------------------------------------------|
|                          | % of infants switching from exclusive breastfeeding to partial or exclusive formula feeding: not detailed                                                                                                                   | Significantly lower number of visits in the pediatric infant formula, compared with vitamin D supplementation                                                                                                                                                                                                                                                                                          |
|                          | Number of phone-calls and visits due to infantile colic: noted by the pediatrician.                                                                                                                                         |                                                                                                                                                                                                                                                                                                                                                                                                        |
|                          | Serum 25(OH)D: Cobas e411 automated immunoassay                                                                                                                                                                             | At baseline: No significant differences between-groups                                                                                                                                                                                                                                                                                                                                                 |
|                          | Dietary intake: Food frequency questionnaire analyzed using FETA open source software                                                                                                                                       | At baseline: No significant differences between-groups                                                                                                                                                                                                                                                                                                                                                 |
| Tazzyma n, 2015, UK [26] | IBS symptom: questionnaire assessing abdominal pain (pain severity and number of days with pain), bloating, bowel habits (minimum and maximum bowel movement per day and satisfaction with bowel habit) and quality of life | At baseline: No significant differences between-groups<br>At endline: In the I and C2 groups compared with the C1 group: - Significantly higher 25OHD (ng/mL) ( $37.2 \pm 9.3$ and $37.1 \pm 11.7$ vs. $25.3 \pm 8.0$ )<br>No significant between-group differences for any symptom tested, and total symptom severity (same results obtained for participants who were 25(OH)D-deficient at baseline) |
|                          |                                                                                                                                                                                                                             | Vitamin D and probiotic co-supplementation had no significant effect on the symptoms of IBS, compared with vitamin D alone, or placebo                                                                                                                                                                                                                                                                 |

25(OH)D: 25-hydroxyvitamin D; AFI: Amniotic Fluid Index; BAI: Beck Anxiety Inventory; BALP: Bone-Specific Alkaline Phosphatase; BDI: Beck Depression Inventory; BMD: Bone Mineral Density; BMI: Body Mass Index; BPRS: Brief Psychiatric Rating Scale; C: Control; CHD: Coronary Heart Disease; CI: Confidence Interval; CXT: Collagen Type 1 Cross-Linked C-Telopeptide; DASS: Depression Anxiety and Stress Scale; DBP: Diastolic Blood Pressure; ELISA: Enzyme-Linked Immunosorbent Assay; FBG: Fasting plasma glucose; GDM: Gestational Diabetes Mellitus; GHQ-28: General Health Questionnaire-28; GSH: Total Glutathione; HDL-C: High-Density Lipoprotein Cholesterol; HOMA-IR: Homeostasis Model of Assessment-Insulin Resistance; hs-CRP: High-Sensitivity C-Reactive Protein; I: Intervention; IBS: Irritable Bowel Syndrome; IL: Interleukin; LDL-C: Low-Density Lipoprotein Cholesterol; MDA: Malondialdehyde; MET: Metabolic Equivalent; mFG: modified Ferriman-Gallwey; NO: Nitric oxide; PCOS: Polycystic Ovary Syndrome; PSQI: Pittsburgh Sleep Quality Index; PTH: Parathyroid Hormone; QUICKI: Quantitative Insulin Sensitivity Check Index; RANKL: Serum Total Receptor Activator of Nuclear Factor- $\kappa$ B Ligand; RR: Relative Risk; SBP: Systolic Blood Pressure; SHGB: Sex Hormone-Binding Globulin; T2DM: Type 2 Diabetes Mellitus; TAC: Total Antioxidant Capacity; TC: Total cholesterol; TG: TNF: Tumor Necrosis Factor; Triglycerides; VLDL-C: Very Low-Density Lipoprotein Cholesterol. <sup>1</sup>Significance obtained for the time  $\times$  group interaction, computed by analysis of the one-way repeated measures ANOVA. <sup>2</sup>Outcome measures refer to the change in values of measures of interest between baseline and endline in each group. <sup>3</sup> $\beta$ : difference in the mean outcomes measures between treatment groups, and significance obtained from multiple regression model (adjusted for baseline values of each variable).
